# Supplementary material for: Metal–organic-framework-engaged formation of Co nanoparticle-embedded carbon@Co9S8 double-shelled nanocages for efficient oxygen reduction
Source: Royal Society of Chemistry journal article supplement (doi:10.1039/c5ee02903a), 2015-11-17
Supplement: c5ee02903a1.pdf [file c5ee02903a1.pdf]

## Electronic Supplementary Information

---

### **Metal-organic-framework-engaged formation of Co nanoparticles-embedded carbon@Co<sub>9</sub>S<sub>8</sub> double-shelled nanocages for efficient oxygen reduction**

Han Hu,<sup>a</sup> Lei Han,<sup>a</sup> Mengzhou Yu,<sup>b</sup> Zhiyu Wang\*<sup>b</sup> and Xiong Wen (David) Lou\*<sup>a</sup>

<sup>a</sup> School of Chemical and Biomedical Engineering, Nanyang Technological University, 62 Nanyang Drive, Singapore, 637459, (Singapore) E-mail: [xwlou@ntu.edu.sg](mailto:xwlou@ntu.edu.sg); [davidlou88@gmail.com](mailto:davidlou88@gmail.com);

Webpage: <http://www.ntu.edu.sg/home/xwlou/>

<sup>b</sup> Carbon Research Laboratory, School of Chemical Engineering, State Key Lab of Fine Chemicals, Dalian University of Technology, Dalian, Liaoning, 116024, China Email: [zywang@dlut.edu.cn](mailto:zywang@dlut.edu.cn)

### **Experimental details**

*Synthesis of ZIF-67 polyhedrons:* In a typical synthesis, two solutions were prepared by dissolving Co(NO<sub>3</sub>)<sub>2</sub>·6H<sub>2</sub>O (291 mg) and 2-methylimidazole (328 mg) in 25 mL of methanol, respectively. Then, the two solutions were mixed rapidly and aged for 24 h at room temperature. The precipitate was washed by ethanol for 4 times before vacuum dried at room temperature overnight.

*Synthesis of ZIF-67@a-CoS yolk-shell structures:* 40 mg of ZIF-67 particles was dispersed in 40 mL of ethanol under ultrasonic, followed by adding 0.18 g of thioacetamide (TAA) and refluxing at 90 °C for 12 min. Afterwards, the products were harvested by several rinsing-centrifugation cycles. By prolonging the reaction time to 30 min, a-CoS nanocages with entirely hollow cavity can be obtained.

*Synthesis of Co-C@Co<sub>9</sub>S<sub>8</sub> DSNCs:* The Co-C@Co<sub>9</sub>S<sub>8</sub> DSNCs were fabricated by annealing ZIF-67@a-CoS yolk-shell structures in nitrogen flow for 2 h at 600 °C with a ramp rate of 1 °C

min<sup>-1</sup>. For comparison, Co-C polyhedrons and Co<sub>9</sub>S<sub>8</sub> nanocages were also prepared by annealing ZIF-67 particles and *a*-CoS nanocages under similar conditions, respectively.

*Materials Characterization:* X-ray diffraction (XRD) patterns were collected on a Bruker D2 Phaser X-Ray Diffractometer with Ni filtered Cu *K*α radiation ( $\lambda = 1.5406 \text{ \AA}$ ) at a voltage of 30 kV and a current of 10 mA. Field-emission scanning electron microscopy (FESEM; JEOL, JEM-6700F, 5 kV) and transmission electron microscopy (TEM; JEOL, JEM-1400/JEM-2010, 200 kV) were utilized to analyze the microstructures of different samples. The nitrogen adsorption-desorption isotherms of Co-C@Co<sub>9</sub>S<sub>8</sub> DSNCs, Co-C polyhedrons and Co<sub>9</sub>S<sub>8</sub> nanocages were recorded with a Quantachrome Autosorb AS-6B system.

*Electrochemical Measurements:* The electrocatalytic activity of the samples was examined by using a three-electrode system with a PARSTAT MC potentiostat/galvanostat workstation. A polished glass carbon (GC) disk electrode was used as a support. The catalyst suspension was prepared by dispersing 5 mg of the catalyst in 1 mL of ethanol under sonication. In order to prepare the working electrode, 15  $\mu\text{L}$  of the suspension was pipetted on the surface of GC electrode, followed by dropping another 5  $\mu\text{L}$  of Nafion solution (0.5 wt.%) to glue the catalyst on the surface of GC electrode. The counter electrode and reference electrode were a Pt wire and a saturated calomel electrode (SCE), respectively. All the measured potentials were referred to reversible hydrogen electrode (RHE) with following equation:

$$E(\text{RHE}) = E(\text{SCE}) + (0.242 + 0.059 \text{ pH})\text{V}$$

The cyclic voltammetry (CV) measurements for Co-C polyhedrons, Co-C@Co<sub>9</sub>S<sub>8</sub> DSNCs and 20 wt.% Pt/C in both Ar- and O<sub>2</sub>-saturated KOH solutions were performed in the potential range of 0 to 1.2 V with a scan rate of 10 mV s<sup>-1</sup> while other CV curves were recorded in the potential range

of 0 to 1 V. Furthermore, the CV curves of the Co-C@Co<sub>9</sub>S<sub>8</sub> DSNCs at scan rates of 20, 50 and 100 mV s<sup>-1</sup> in O<sub>2</sub>-saturated KOH solutions were also recorded. For comparison of the effect of methanol crossover, the CV curves of Co-C@Co<sub>9</sub>S<sub>8</sub> DSNCs and 20 wt.% Pt/C in O<sub>2</sub>-saturated mixture solution containing KOH and methanol (KOH, 0.1 M; methanol, 3.0 M) were conducted. The polarization curves for ORR were conducted at various rotation speeds from 400 to 2,500 rpm with a scan rate of 10 mV s<sup>-1</sup>. The *I-t* curves were tested in O<sub>2</sub>-saturated solution under a fixed potential with a rotation speed of 1600 rpm. Before testing, the electrodes were cycled at 100 mV s<sup>-1</sup> until reproducible CV curves were obtained.

On the basis of the RDE data, the electron transfer number (*n*) was calculated from the Koutecky–Levich (K-L) equation:

$$1/j = 1/j_k + 1/B\omega^{1/2}$$

Where *j<sub>k</sub>* is the kinetic current and  $\omega$  represents the rotation speed. *B* can be determined from the slope of the K-L plots. Then, *n* can be obtained via the followed equation:

$$n = B / (0.2F(D_{O_2})^{2/3}(\nu)^{-1/6}C_{O_2})$$

where *F* is Faraday constant (96485 C mol<sup>-1</sup>), *D<sub>O<sub>2</sub></sub>*

 is the diffusion coefficient of O<sub>2</sub> (1.9×10<sup>-5</sup> cm<sup>2</sup> s<sup>-1</sup>), *ν* is the kinetic viscosity (*ν* = 0.01 cm<sup>2</sup> s<sup>-1</sup>) and *C<sub>O<sub>2</sub></sub>* is the bulk concentration of O<sub>2</sub> (1.2×10<sup>-6</sup> mol cm<sup>-3</sup>). When expressing the rotation speed in rpm, the constant 0.2 is applied.

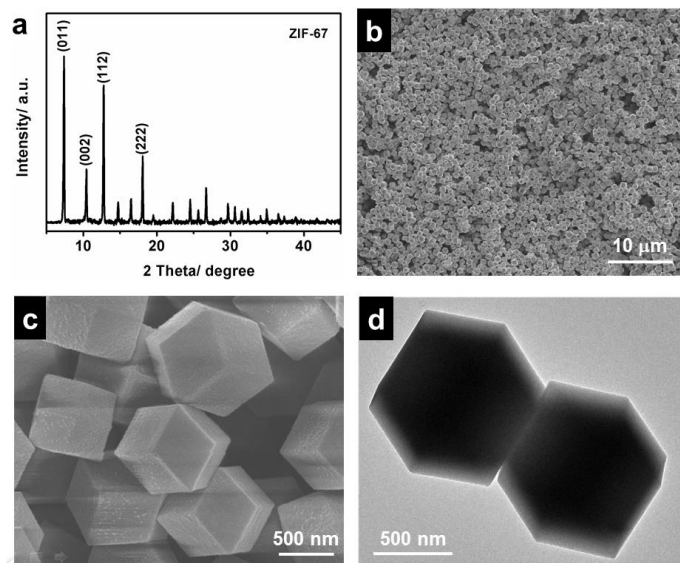

**Fig. S1** (a) XRD pattern of ZIF-67 polyhedrons; (b, c) FESEM images of ZIF-67 polyhedrons; (d) TEM image of ZIF-67 polyhedrons.

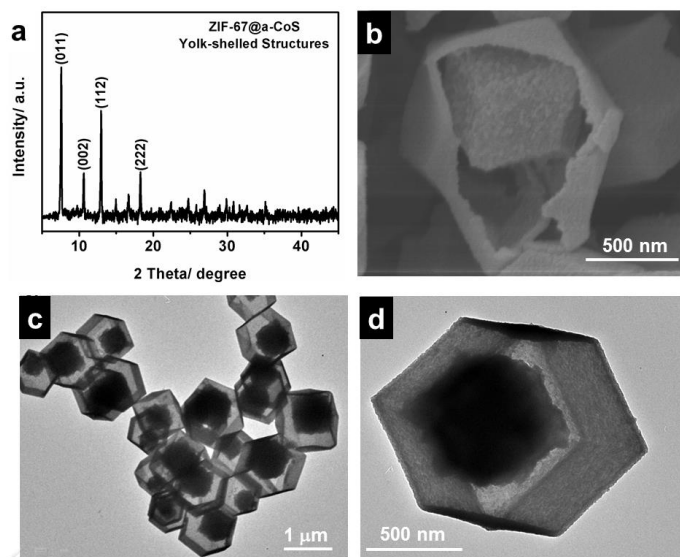

**Fig. S2** (a) XRD pattern of ZIF-67@a-CoS yolk-shell structures; (b) FESEM image of an individual yolk-shell structure with broken shell; (c, d) TEM images of ZIF-67@a-CoS yolk-shell structures.

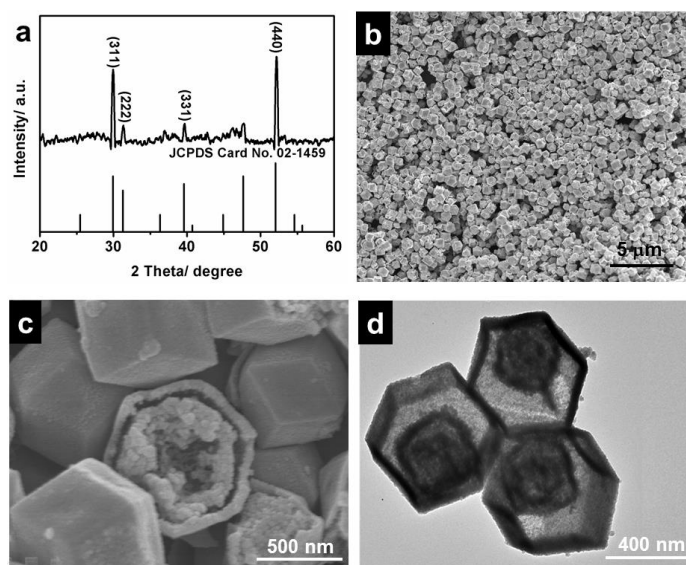

**Fig. S3** (a) XRD pattern of Co-C@Co<sub>9</sub>S<sub>8</sub> DSNCs; (b) FESEM images of Co-C@Co<sub>9</sub>S<sub>8</sub> DSNCs; (c) FESEM image of an individual Co-C@Co<sub>9</sub>S<sub>8</sub> nanocage with broken shell; (d) TEM image of Co-C@Co<sub>9</sub>S<sub>8</sub> DSNCs.

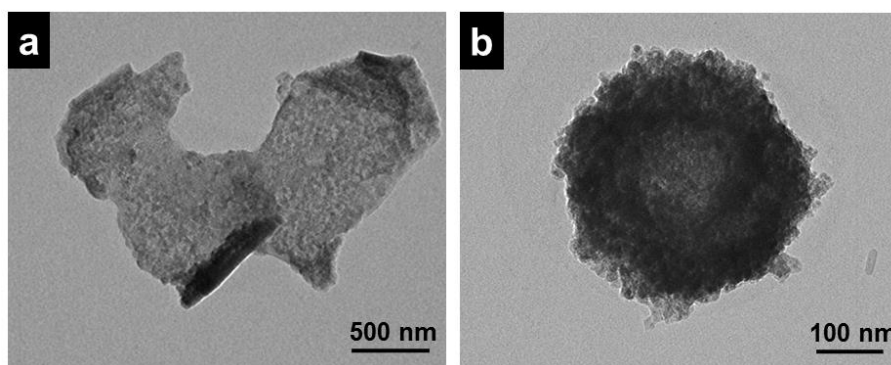

**Fig. S4** TEM images of (a) outer Co<sub>9</sub>S<sub>8</sub> shell and (b) inner Co-C nanocage. They were obtained by breaking the Co-C@Co<sub>9</sub>S<sub>8</sub> DSNCs under strong ultrasonic.

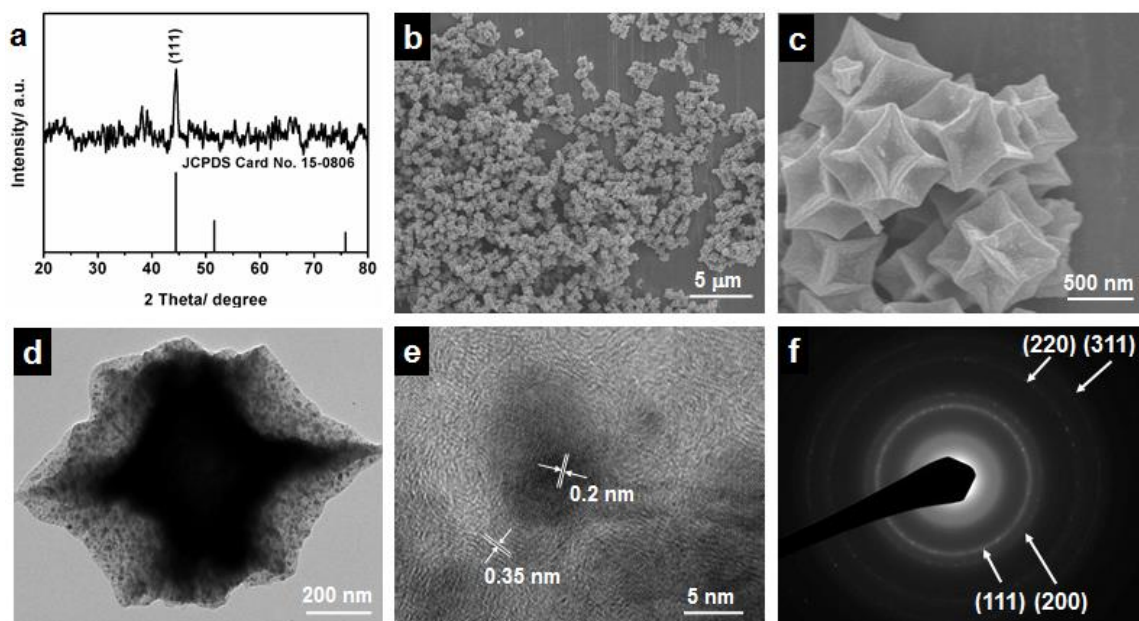

**Fig. S5** (a) XRD pattern, (b, c) FESEM images, (d) TEM image, (e) HRTEM image, and (f) SAED pattern of concave Co-C polyhedrons, which were obtained by directly annealing ZIF-67 polyhedrons at 600 °C in nitrogen flow.

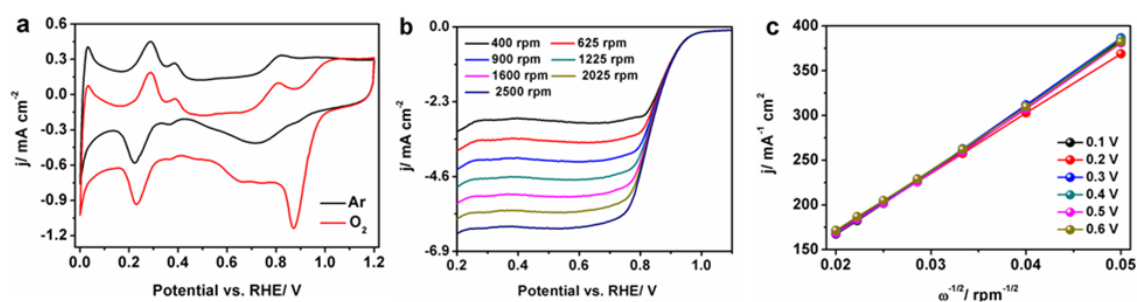

**Fig. S6** (a) CV curves of a commercial 20 wt.% Pt/C catalyst in Ar- and O<sub>2</sub>-saturated 0.1 M KOH solution; (b) LSV curves of Pt/C catalyst at different rotation rates; (c) Koutecky–Levich plots of Pt/C catalyst at various potentials.

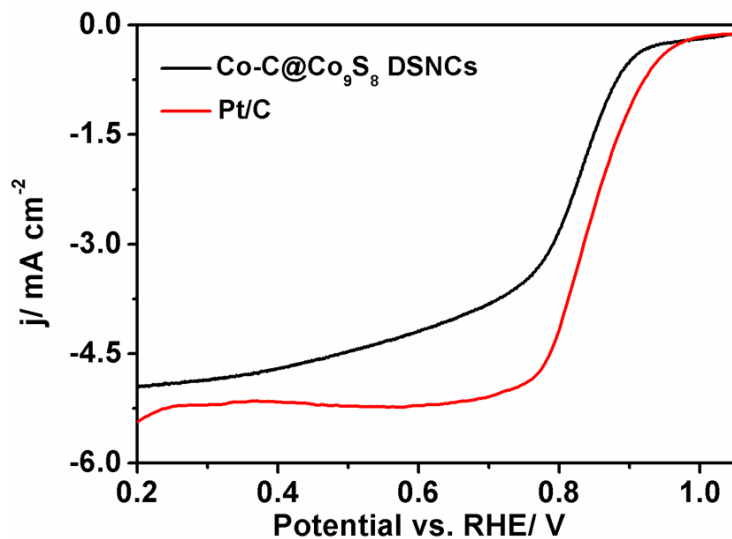

**Fig. S7** Comparison of the LSV curves of Co-C@Co<sub>9</sub>S<sub>8</sub> DSNCs and Pt/C at the rotation speed of 1600 rpm.

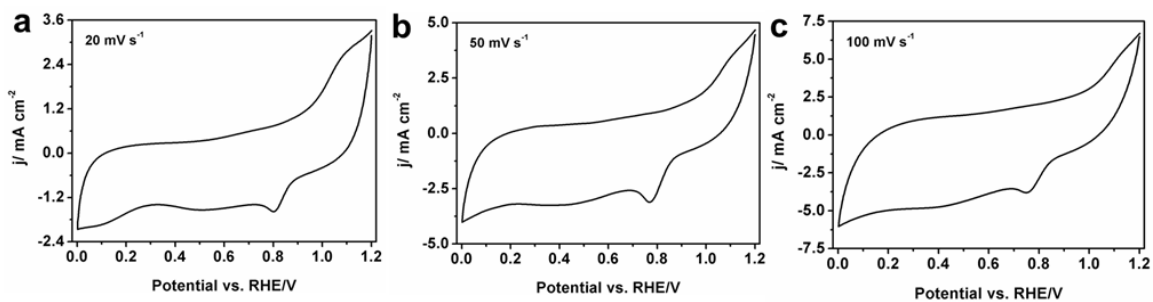

**Fig. S8** CV curves of Co-C@Co<sub>9</sub>S<sub>8</sub> DSNCs in O<sub>2</sub>-saturated 0.1 M KOH solution at scan rates of (a) 20, (b) 50 and (c) 100 mV s<sup>-1</sup>.

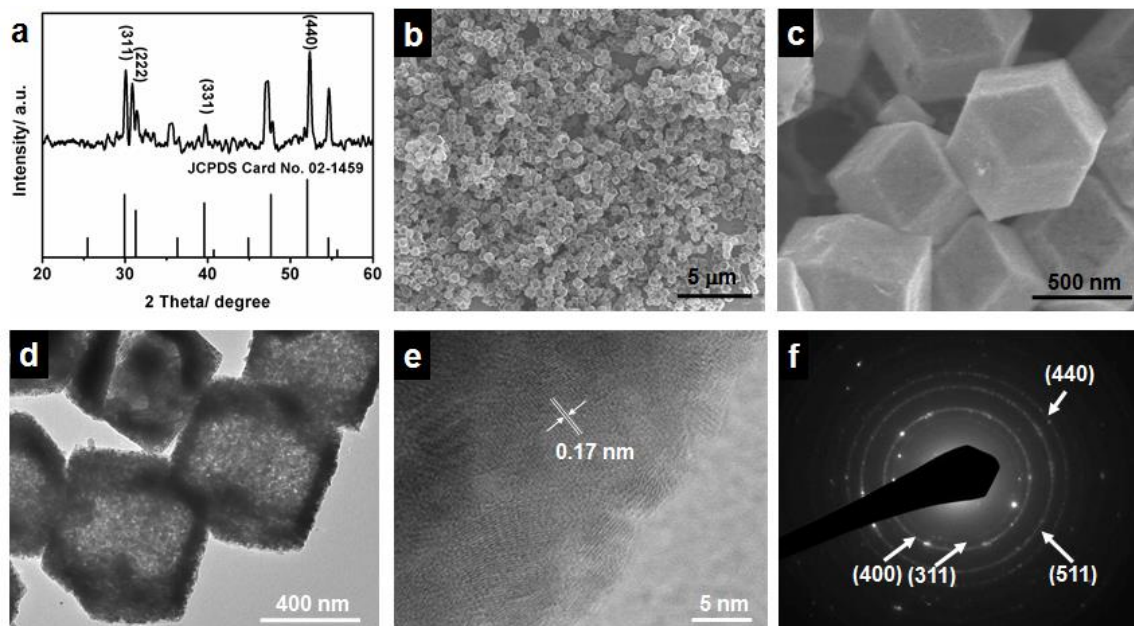

**Fig. S9** (a) XRD pattern, (b, c) FESEM images, (d) TEM image, (e) HRTEM image, and (f) SAED pattern of  $\text{Co}_9\text{S}_8$  nanocages, which were obtained by directly annealing a-CoS nanocages at  $600\text{ }^\circ\text{C}$  in nitrogen flow.

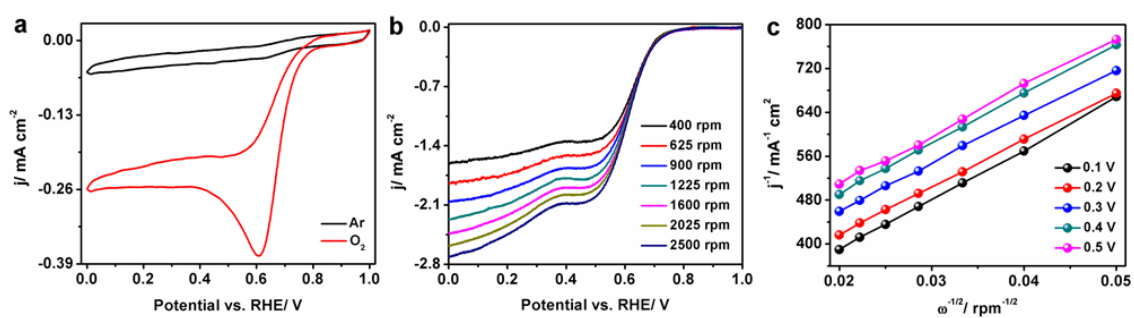

**Fig. S10** (a) CV curves of  $\text{Co}_9\text{S}_8$  nanocages in Ar- and  $\text{O}_2$ -saturated  $0.1\text{ M KOH}$  solution; (b) LSV curves of  $\text{Co}_9\text{S}_8$  nanocages at different rotation rates; (c) Koutecky–Levich plots of  $\text{Co}_9\text{S}_8$  nanocages at various potentials.



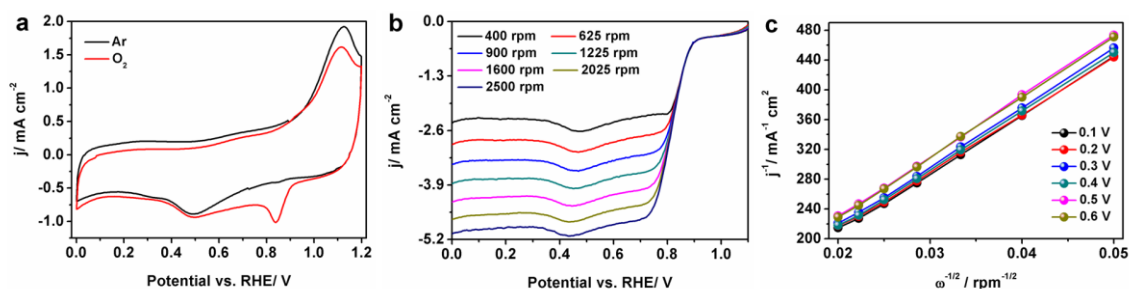

**Fig. S11** (a) CV curves of Co-C polyhedrons in Ar- and O<sub>2</sub>-saturated 0.1 M KOH solution; (b) LSV curves of Co-C polyhedrons at different rotation rates; (c) Koutecky–Levich plots of Co-C polyhedrons at various potentials.

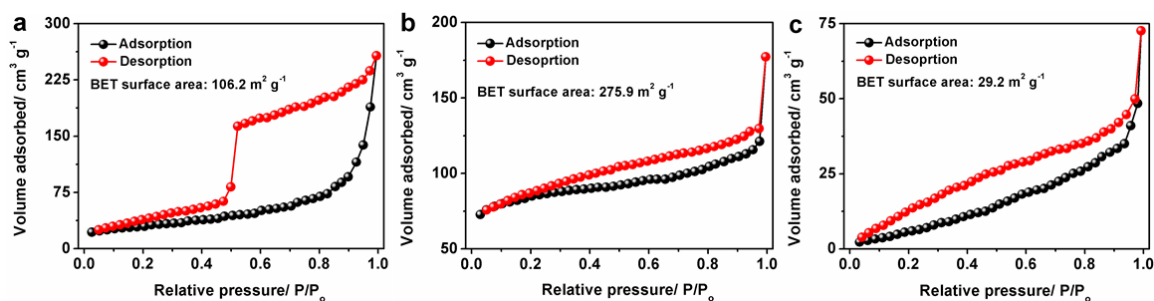

**Fig. S12** Nitrogen adsorption-desorption isotherms of Co-C@Co<sub>9</sub>S<sub>8</sub> DSNCs (a), Co-C polyhedrons (b), and Co<sub>9</sub>S<sub>8</sub> nanocages (c) at 77 K.

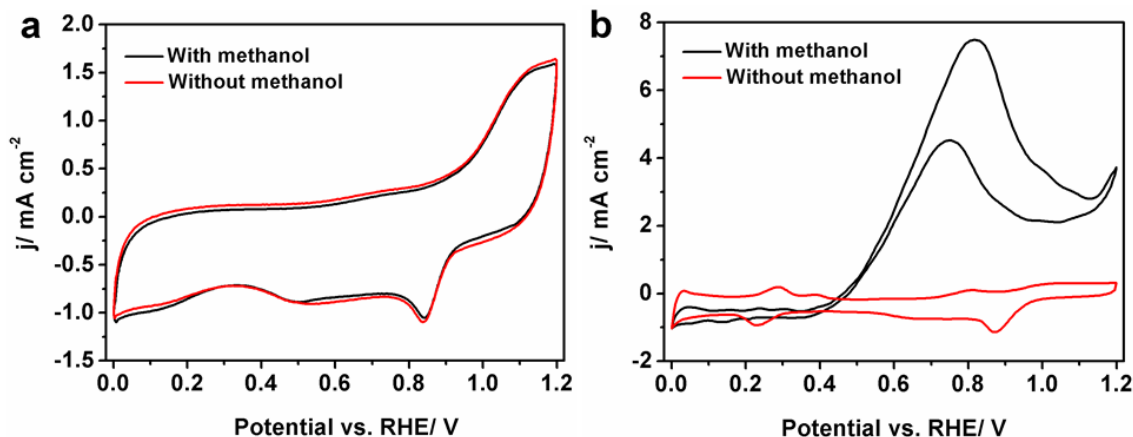

**Fig. S13** CV curves of (a) Co-C@Co<sub>9</sub>S<sub>8</sub> DSNCs and (b) Pt/C in O<sub>2</sub>-saturated KOH solution (0.1 M) and O<sub>2</sub>-saturated mixture solution (KOH, 0.1 M; Methanol, 3 M).

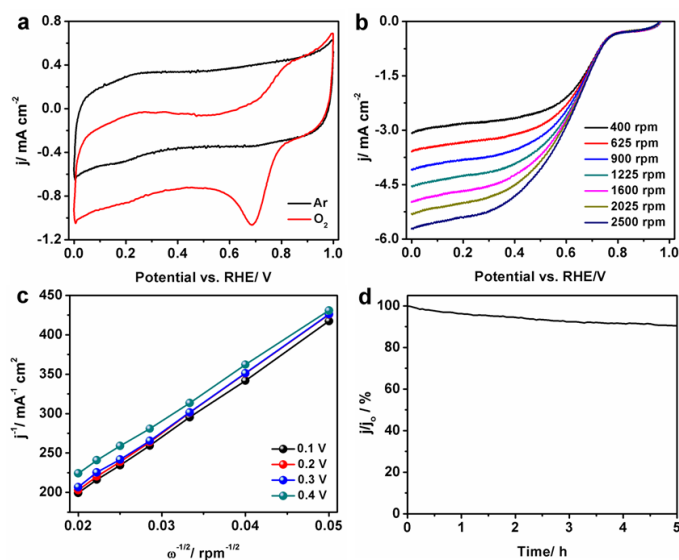

**Fig. S14** (a) CV curves of Co-C@Co<sub>9</sub>S<sub>8</sub> DSNCs in Ar- and O<sub>2</sub>-saturated 0.1 M HClO<sub>4</sub> solution at a scan rate of 10 mV s<sup>-1</sup>; (b) LSV curves of Co-C@Co<sub>9</sub>S<sub>8</sub> DSNCs at different rotation rates; (c) Koutecky–Levich plots of Co-C polyhedrons at various potentials; (d) Chronoamperometric responses of Co-C@Co<sub>9</sub>S<sub>8</sub> DSNCs at 0.4 V in O<sub>2</sub>-saturated 0.1 M HClO<sub>4</sub> solution at 1600 rpm.

**Table S1** Comparison of the electrocatalytic activity of Co-C@Co<sub>9</sub>S<sub>8</sub> DSNCs with some newly reported electrocatalysts

| Catalyst                                  | Onset Potential/V | Cathodic peak potential/V | Electrolyte | Scan rate/<br>mV s <sup>-1</sup> | Reference |
|-------------------------------------------|-------------------|---------------------------|-------------|----------------------------------|-----------|
| Fe <sub>3</sub> O <sub>4</sub> /N-GAs     | 0.774             | 0.624                     | 0.1 M KOH   | 100                              | 1         |
| g-C <sub>3</sub> N <sub>4</sub> @CMK-3    | --                | 0.714                     | 0.1 M KOH   | --                               | 2         |
| N-S-G                                     | --                | 0.724                     | 0.1 M KOH   | 100                              | 3         |
| N-CG-CoO                                  | --                | 0.753                     | 1 M KOH     | 50                               | 4         |
| N-carbon nanosheets                       | --                | 0.73                      | 0.1 M KOH   | 50                               | 5         |
| N-carbon nanocages                        | 0.834             | 0.744                     | 0.1 M KOH   | 10                               | 6         |
| N-carbon                                  | --                | 0.776                     | 0.1 M KOH   | 10                               | 7         |
| NiCo <sub>2</sub> S <sub>4</sub> @N/S-rGO | 0.854             | 0.744                     | 0.1 M KOH   | 20                               | 8         |
| G-CN800                                   | --                | 0.714                     | 0.1 M KOH   | 100                              | 9         |
| Co-C@Co <sub>9</sub> S <sub>8</sub> DSNCs | 0.96              | 0.83                      | 0.1 M KOH   | 10                               | This work |
| Co-C@Co <sub>9</sub> S <sub>8</sub> DSNCs | 0.91              | 0.80                      | 0.1 M KOH   | 20                               | This work |
| Co-C@Co <sub>9</sub> S <sub>8</sub> DSNCs | 0.89              | 0.77                      | 0.1 M KOH   | 50                               | This work |
| Co-C@Co <sub>9</sub> S <sub>8</sub> DSNCs | 0.87              | 0.75                      | 0.1 M KOH   | 100                              | This work |
| Pt/C                                      | 1.05              | 0.87                      | 0.1 M KOH   | 10                               | This work |

**Table S2** Comparison of current densities of samples at different potentials and rotation speeds

| Sample                                    | Current density / mA cm <sup>-2</sup> |          |          |          | Reference |
|-------------------------------------------|---------------------------------------|----------|----------|----------|-----------|
|                                           | 0.4 V                                 |          | 0.5 V    |          |           |
|                                           | 2500 rpm                              | 1600 rpm | 2500 rpm | 1600 rpm |           |
| Co-C@Co <sub>9</sub> S <sub>8</sub> DSNCs | 5.3                                   | 4.71     | 5.05     | 4.50     | This work |
| G-Co/CoO                                  | 5.1                                   | 4.4      | 4.95     | 4.32     | 10        |
| Carbon-L                                  | --                                    | 3.72     | --       | 3.51     | 5         |
| Co <sub>3</sub> S <sub>4</sub> /G         | --                                    | 3.17     | --       | 2.99     | 11        |

## Supplementary References

1. Z. S. Wu, S. Yang, Y. Sun, K. Parvez, X. L. Feng, K. Müllen, *J. Am. Chem. Soc.*, 2012, **134**, 9082.
2. Y. Zheng, Y. Jiao, J. Chen, J. Liu, J. Liang, A. Du, W. M. Zhang, Z. H. Zhu, S. C. Smith, M. Jaroniec, G. Q. Lu, S. Z. Qiao, *J. Am. Chem. Soc.*, 2011, **133**, 20116.
3. J. Liang, Y. Jiao, M. Jaroniec, S. Z. Qiao, *Angew. Chem. Int. Ed.*, 2012, **51**, 11496.
4. S. Mao, Z. Wen, T. Huang, Y. Hou, J. H. Chen, *Energy Environ. Sci.*, 2014, **7**, 609.
5. P. Zhang, F. Sun, Z. H. Xiang, Z. G. Shen, J. Yun, D. P. Cao, *Energy Environ. Sci.*, 2014, **7**, 442.
6. S. Chen, J. Bi, Y. Zhao, L. Yang, C. Zhang, Y. Ma, Q. Wu, X. Wang, Z. Hu, *Adv. Mater.*, 2012, **24**, 5593.
7. S. Gao, K. Geng, H. Liu, X. Wei, M. Zhang, P. Wang, J. Wang, *Energy Environ. Sci.*, 2015, **8**, 221.
8. Q. Liu, J. Jin, J. Zhang, *ACS Appl. Mater. Interfaces*, 2013, **5**, 5002.
9. S. Yang, X. L. Feng, X. Wang, K. Müllen, *Angew. Chem. Int. Ed.*, 2011, **50**, 5339.
10. S. J. Guo, S. Zhang, L. H. Wu, S. H. Sun, *Angew. Chem. Int. Ed.*, 2012, **51**, 11770.
11. N. Mahmood, C. Z. Zhang, J. Jiang, F. Liu, Y. L. Hou, *Chem. Eur. J.*, 2013, **19**, 5183.
